# Supplementary material for: Bermuda grass latent virus in Australia: genome sequence, sequence variation, and new hosts
Source: Arch Virol. 2022 Apr 8;167(5):1317–23. doi: 10.1007/s00705-022-05434-6 (PMC9038842; doi:10.1007/s00705-022-05434-6)
Supplement: Supplementary file 4 — Supplementary file4 (XLSX 21 KB) [file 705_2022_5434_MOESM4_ESM.xlsx]

## Sheet: Pairwise nt identities
Supplementary Table S2	Pairwise nucleotide distance (% identity) between Australian isolates of Bermuda grass latent virus and other recognized panicovirus species
	based on 301 nt long sequence of the partial RNA-dependent RNA polymerase sequences, calculated using Geneious Alignment in Geneious Prime
Isolate/ GenBank accession	5651	5657	5658	5659	5660	5661	5662	5663	5812	5813	5814	5815	5816	5818	KX758441	U55002	JX848617	EU081018
5651		88	89.4	88.7	88.4	89.7	87.7	96.7	99.3	99.3	99.7	99.7	99	88.7	87.4	66.8	64.8	63.8
5657	88		96.3	98.3	98.7	96.7	98.3	88.4	88	88	88.4	88.4	88.4	98.7	96.3	66.4	65.4	62.8
5658	89.4	96.3		96	97	97	96	88.7	89.4	89.4	89.7	89.7	89.7	96.3	96	68.1	65.4	63.5
5659	88.7	98.3	96		99	96.3	98	89	88.7	88.7	89	89	89	98.3	96	66.4	64.1	62.1
5660	88.4	98.7	97	99		97.3	98.3	88.7	88.4	88.4	88.7	88.7	88.7	98.7	97	66.1	65.1	62.5
5661	89.7	96.7	97	96.3	97.3		96.3	89.4	89.7	89.7	90	90	90	97.3	96.3	66.8	66.8	63.5
5662	87.7	98.3	96	98	98.3	96.3		88	87.7	87.7	88	88	88	99	96	65.4	64.8	61.8
5663	96.7	88.4	88.7	89	88.7	89.4	88		96.7	96.7	97	97	96.7	89	87.7	66.8	65.4	63.5
5812	99.3	88	89.4	88.7	88.4	89.7	87.7	96.7		100	99.7	99.7	99	88.7	87.4	67.1	65.1	64.5
5813	99.3	88	89.4	88.7	88.4	89.7	87.7	96.7	100		99.7	99.7	99	88.7	87.4	67.1	65.1	64.5
5814	99.7	88.4	89.7	89	88.7	90	88	97	99.7	99.7		100	99.3	89	87.7	67.1	65.1	64.1
5815	99.7	88.4	89.7	89	88.7	90	88	97	99.7	99.7	100		99.3	89	87.7	67.1	65.1	64.1
5816	99	88.4	89.7	89	88.7	90	88	96.7	99	99	99.3	99.3		89	87.7	66.8	64.5	64.1
5818	88.7	98.7	96.3	98.3	98.7	97.3	99	89	88.7	88.7	89	89	89		96.3	66.1	65.1	62.5
KX758441	87.4	96.3	96	96	97	96.3	96	87.7	87.4	87.4	87.7	87.7	87.7	96.3		67.1	66.1	62.1
U55002	66.8	66.4	68.1	66.4	66.1	66.8	65.4	66.8	67.1	67.1	67.1	67.1	66.8	66.1	67.1		73.4	65.4
JX848617	64.8	65.4	65.4	64.1	65.1	66.8	64.8	65.4	65.1	65.1	65.1	65.1	64.5	65.1	66.1	73.4		66.1
EU081018	63.8	62.8	63.5	62.1	62.5	63.5	61.8	63.5	64.5	64.5	64.1	64.1	64.1	62.5	62.1	65.4	66.1
